# Supplementary material for: Entrapment of Chlorella vulgaris cells within graphene oxide layers
Source: Royal Society of Chemistry journal article supplement (doi:10.1039/c3ra40605a), 2013-01-01
Supplement: c3ra40605a.pdf [file c3ra40605a.pdf]

## Supplementary Information

### Entrapment of *Chlorella vulgaris* cells within graphene oxide layers

M. Haniff Wahid<sup>a</sup>, Ela Eroglu<sup>a,b</sup>, Xianjue Chen<sup>a</sup>, Steven M. Smith<sup>b</sup>, and Colin L. Raston<sup>a,c\*</sup>

<sup>a</sup> Centre for Strategic Nano-Fabrication, School of Chemistry and Biochemistry, The University of Western Australia, Crawley, WA 6009, Australia, Fax: (+61) 8 6488 8683; Tel: (+61) 8 6488 3045; E-mail: colin.raston@uwa.edu.au

<sup>b</sup> ARC Centre for Plant Energy Biology, The University of Western Australia M313, 35 Stirling Highway, Crawley, WA 6009, Australia.

<sup>c</sup> School of Chemical and Physical Sciences, Flinders University, Bedford Park, SA 5042, Australia. E-mail: colin.raston@flinders.edu.au

(a)

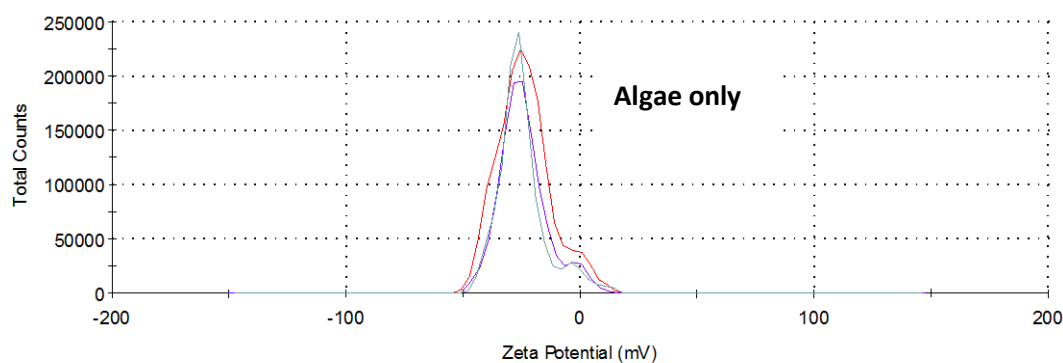

(b)

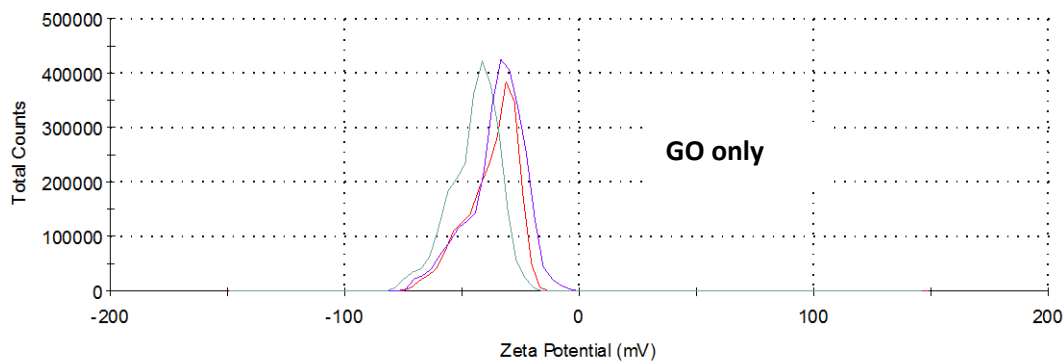

(c)

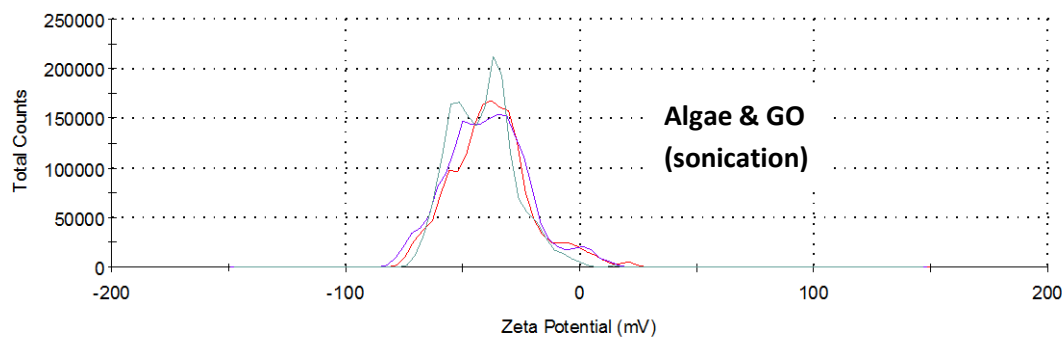

(d)

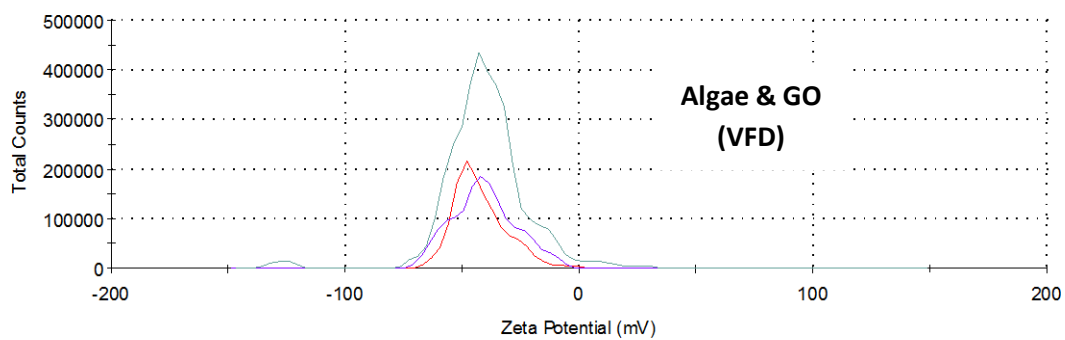

**Figure S1.** Zeta potential distribution of (a) free cells, (b) GO blank; and GO wrapped cells prepared via (c) sonication, and (d) VFD processing.
